# Supplementary material for: Self-assembled novel dandelion-like NiCo2O4 microspheres@nanomeshes with superior electrochemical performance for supercapacitors and lithium-ion batteries
Source: Royal Society of Chemistry journal article supplement (doi:10.1039/c5ta07110k), 2015-01-01
Supplement: c5ta07110k1.pdf [file c5ta07110k1.pdf]

**Supporting information**

**Self-assembled novel dandelion-like NiCo<sub>2</sub>O<sub>4</sub> microspheres@nanomeshes with superior electrochemical performance for supercapacitors and lithium-ion batteries**

Li Liu, Huijuan Zhang, Jiao Yang, Yanping Mu, Yu Wang\*

The State Key Laboratory of Mechanical Transmissions and the School of Chemistry and Chemical Engineering,  
Chongqing University, 174 Shazheng Street, Shapingba District, Chongqing City, P.R. China, 400044

E-mail: *wangy@cqu.edu.cn; prospectwy@gmail.com*

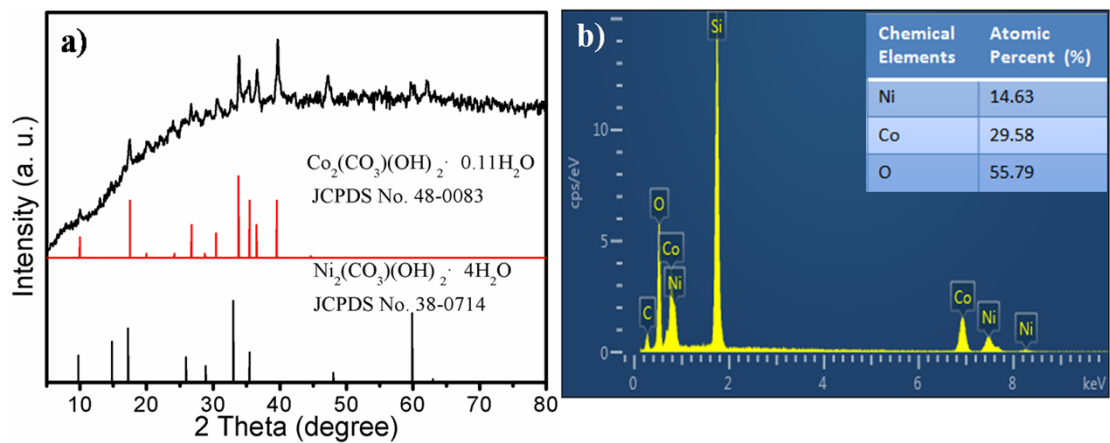

Figure S1. a) XRD patterns of the Co-Ni bimetallic carbonate hydroxide salts precursors, b) EDS image of NCO-M@N.

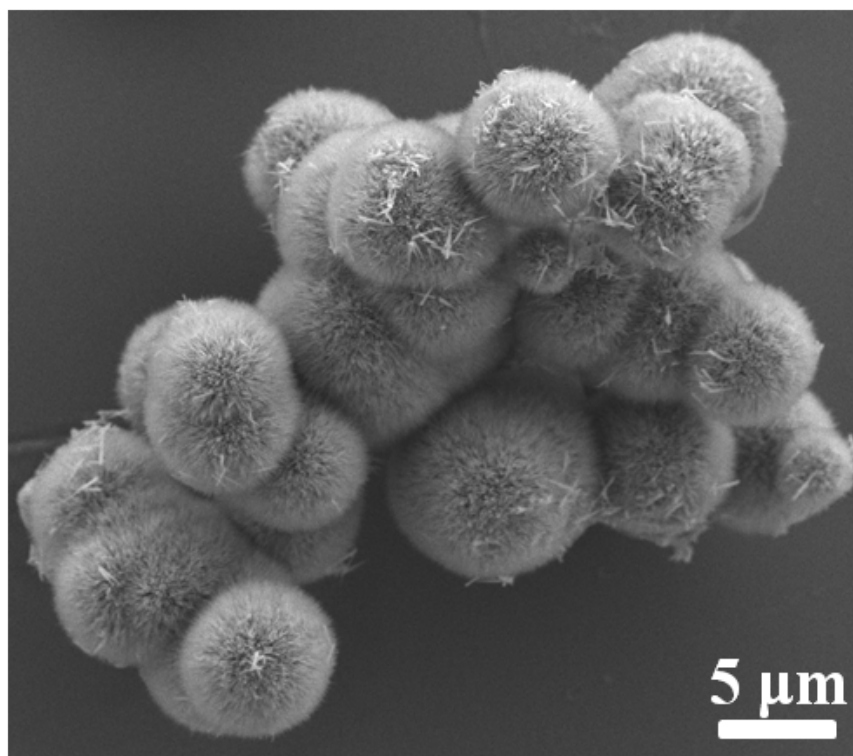

Figure S2. SEM image of the Co-Ni bimetallic carbonate hydroxide salts precursors.

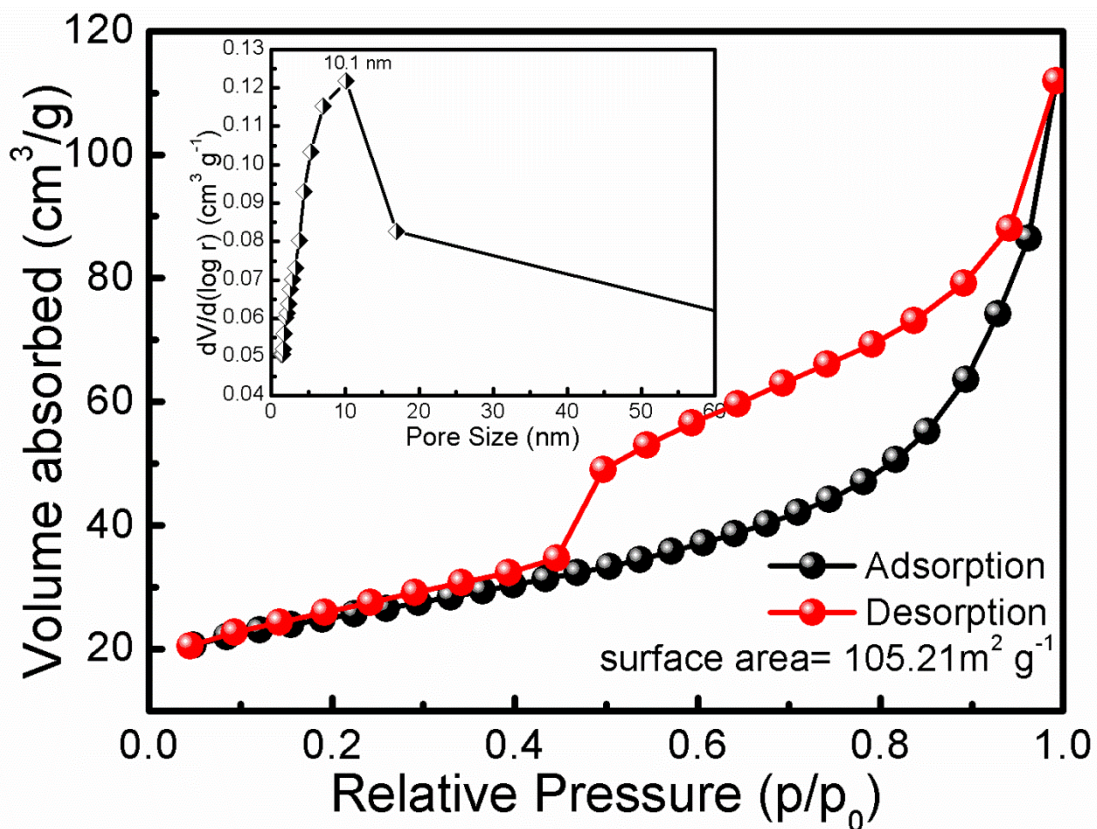

Figure S3. Nitrogen adsorption-desorption isotherm and the corresponding pore size distribution (inset) of NCO-M@N.

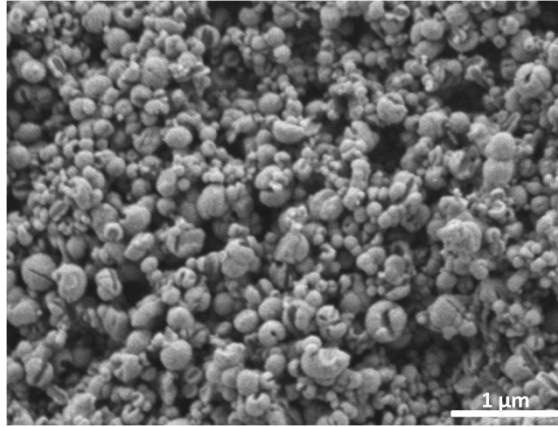

Figure S4. SEM image of the precursor obtained after reaction for 30 min.

Table S1. Comparison of electrochemical performance with other lastly available pseudocapacitive materials.

| Materials                                                         | Capacitance | Current density | Capacity retention       | Reference |
|-------------------------------------------------------------------|-------------|-----------------|--------------------------|-----------|
| dandelion-like NCO-M@N                                            | 2184 F /g   | 1 A/g           | 94.2 % after 4000 cycles | This work |
| Hierarchical NiCo <sub>2</sub> O <sub>4</sub> nanowires           | 760 F /g    | 1 A/g           | 81 % after 3000 cycles   | 1         |
| Porous NiCo <sub>2</sub> O <sub>4</sub> nanowires                 | 743 F /g    | 1 A/g           | 93.8% after 3000 cycles  | 2         |
| Hierarchical NiCo <sub>2</sub> O <sub>4</sub> nanosheets          | 778 F /g    | 2 A/g           | 93.2% after 6000 cycles  | 3         |
| Single crystal NiCo <sub>2</sub> O <sub>4</sub> nanoneedle arrays | 1118.6 F /g | ~ 6 A/g         | 89.4 % after 2000 cycles | 4         |
| NiCo <sub>2</sub> O <sub>4</sub> nanosheets arrays                | 1743 F /g   | 7 A/g           | 93 % after 3000 cycles   | 5         |
| NiCo <sub>2</sub> O <sub>4</sub> @NiO hybrid arrays               | 2220 F /g   | 1 A/g           | 93.1 % after 3000 cycles | 6         |

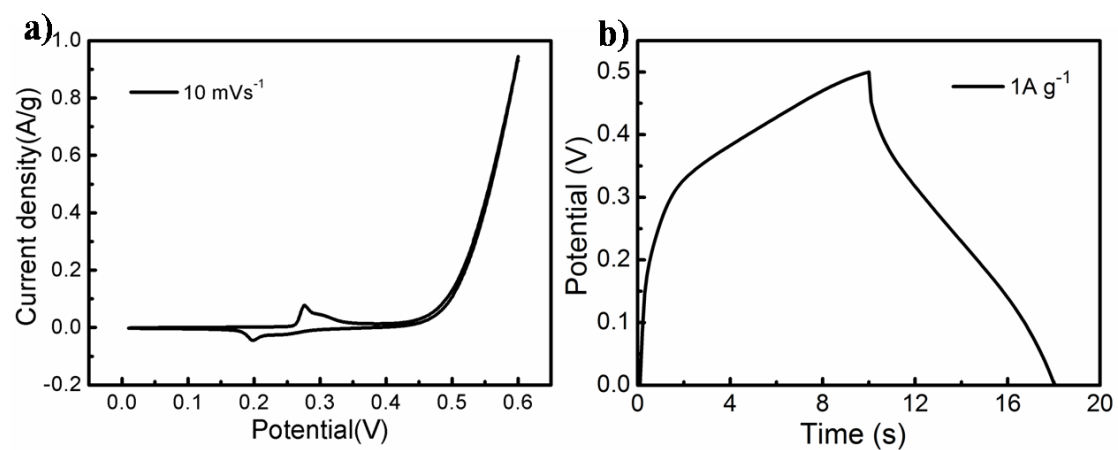

Figure S5. a) CV curves at the scan rates of 10 mV s<sup>-1</sup> of pure Ni foam, b) Charge-discharge voltage profiles at the current densities of 1 A g<sup>-1</sup> of pure Ni foam.

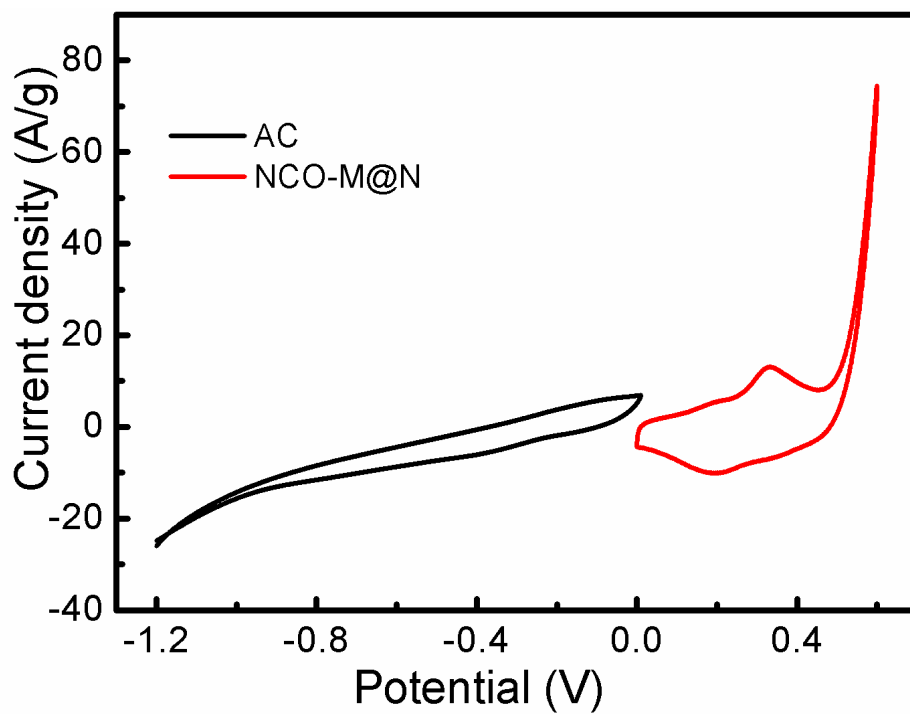

Figure S6. CV curves of NCO-M@N electrode and AC electrode obtained in 2 M KOH aqueous solution with a scan rate of 10 mV s<sup>-1</sup>.



Table S2. Comparison of electrochemical performance with other recently available pseudocapacitive materials, fabricated in an asymmetric supercapacitor device.

| Materials                                                          | Capacitance | Current density        | Energy density | Power density | reference |
|--------------------------------------------------------------------|-------------|------------------------|----------------|---------------|-----------|
| dandelion-like NCO-M@N                                             | 127.5 F/g   | 1 A/g                  | 45.3 Wh/kg     | 533.3 W/ kg   | This work |
| Hollow urchin-like NiCo <sub>2</sub> O <sub>4</sub> microspheres   | 95 F/g      | 1 A/g                  | ~36 Wh/kg      | 852 W/ kg     | 7         |
| NiCo <sub>2</sub> O <sub>4</sub> @NiO hybrid arrays                | ~75 F/g     | 1 A/g                  | 31.5 Wh/kg     | 215.2 W/ kg   | 6         |
| NiCo <sub>2</sub> O <sub>4</sub> @MnO <sub>2</sub> nanowire arrays | 112 F/g     | 1 mA/cm <sup>2</sup>   | 35 Wh/kg       | 163 W/ kg     | 8         |
| ZnCo <sub>2</sub> O <sub>4</sub> @MnO <sub>2</sub> core-shell      | 161 F/g     | 2.5 mA/cm <sup>2</sup> | 37.8 Wh/kg     | 648 W/ kg     | 9         |

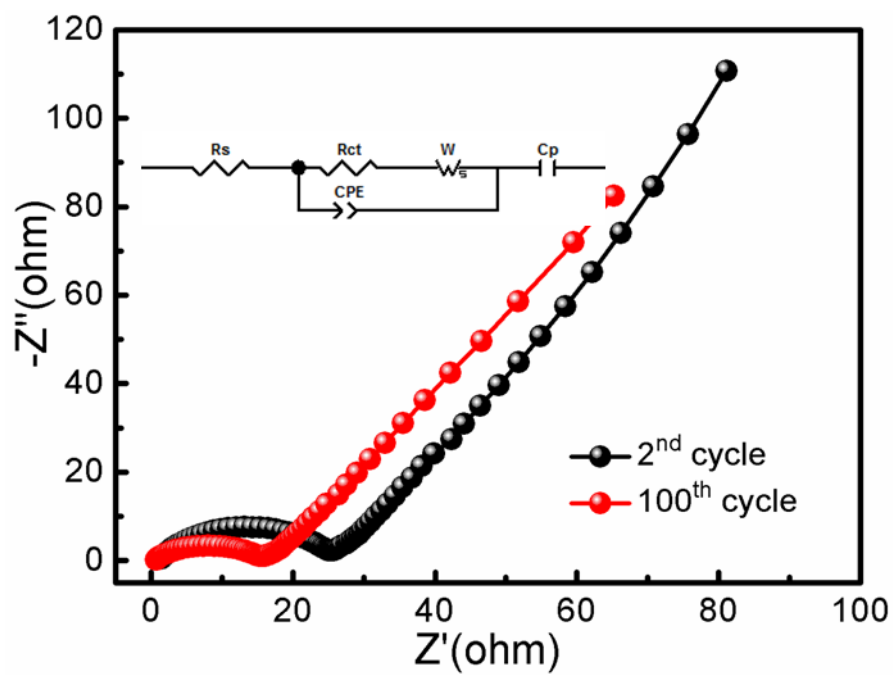

Figure S7. Nyquist plots and the equivalent circuit images (inset) of NCO-M@N before and after 100 cycles.

#### References and notes

1. H. Jiang, J. Ma and C. Li, *Chem. Commun.*, 2012, 48, 4465-4467.
2. H. Wang, Q. Gao and L. Jiang, *Small*, 2011, 7, 2454-2459.
3. G. Gao, H. B. Wu, S. Ding, L.-M. Liu and X. W. Lou, *Small*, 2015, 11, 804-808.
4. G. Q. Zhang, H. B. Wu, H. E. Hoster, M. B. Chan-Park and X. W. Lou, *Energy Environ. Sci.*, 2012, 5, 9453-9456.
5. G. Zhang and X. W. Lou, *Adv. Mater.*, 2013, 25, 976-979.
6. X. Liu, J. Liu and X. Sun, *J. Mater. Chem. A*, 2015, 3, 13900-13905.
7. Y. Lei, Y. Wang, W. Yang, H. Yuan and D. Xiao, *RSC Adv.*, 2015, 5, 7575-7583.
8. K. Xu, W. Li, Q. Liu, B. Li, X. Liu, L. An, Z. Chen, R. Zou and J. Hu, *J. Mater. Chem. A*, 2014, 2, 4795-4802.
9. W. Ma, H. Nan, Z. Gu, B. Geng and X. Zhang, *J. Mater. Chem. A*, 2015, 3, 5442-5448.
